# Supplementary figures and images for: Is intravenous magnesium sulphate a suitable adjuvant in postoperative pain management? – A critical and systematic review of methodology in randomized controlled trials
Source: publisher site journal article supplement (doi:10.1515/sjpain-2022-0048), 2022-12-06

**Table 4: Forest plot of comparison: Morphine consumption 24 h, morphine equivalent (mg).**


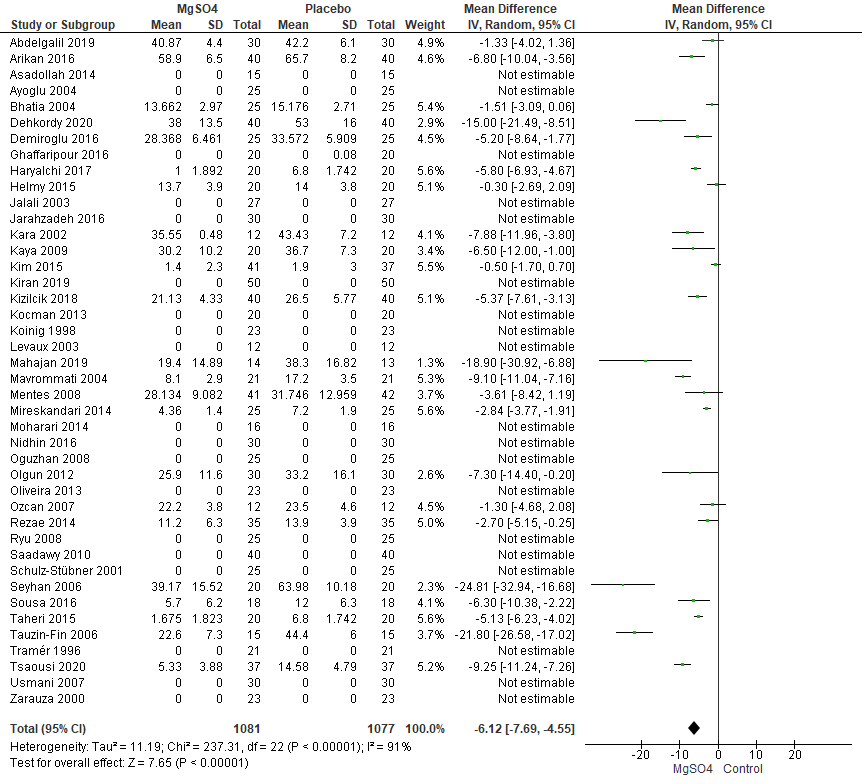

Supplement: Supplementary file 2 [file j_sjpain-2022-0048_suppl_001.docx]
